# Supplementary material
Source: PubMed Central journal article supplement (PMC8477607)
Supplement: NIHMS1550323-supplement-1.pdf [file NIHMS1550323-supplement-1.pdf]

## Supplemental information

### **Combined CD44- and CD25-targeted Near-Infrared Photoimmunotherapy Selectively Kills Cancer and Regulatory T cells in Syngeneic Mouse Cancer Models**

Yasuhiro Maruoka<sup>1</sup>, Aki Furusawa<sup>1</sup>, Ryuhei Okada<sup>1</sup>, Fuyuki Inagaki<sup>1</sup>, Daiki Fujimura<sup>1</sup>,  
Hiroaki Wakiyama<sup>1</sup>, Takuya Kato<sup>1</sup>, Tadanobu Nagaya<sup>1</sup>, Peter L. Choyke<sup>1</sup>, Hisataka  
Kobayashi<sup>1</sup>

<sup>1</sup>Molecular Imaging Program, Center for Cancer Research, National Cancer Institute,  
NIH, Bethesda, MD, 20892, USA

## Supplementary Figure 1

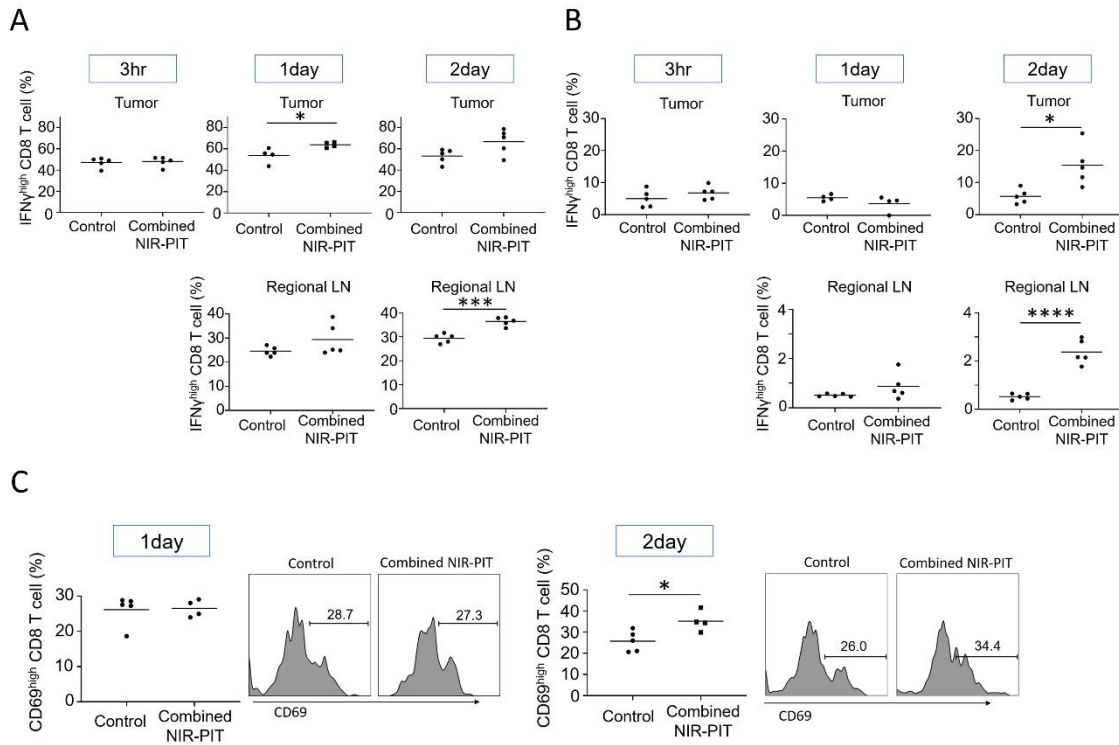

Supplementary Figure 1.

Cytotoxicity and activation of intratumoral CD8 T cells in acute phase after combined CD44- and CD25-targeted NIR-PIT.

A. Cytotoxic action of CD8 T cells (CD3+CD8+ cells) infiltrating into tumors or regional lymph nodes (LNs) in mice bearing MC38-luc tumors with or without combined CD44- and CD25-targeted NIR-PIT was examined by flow cytometry under IFN- $\gamma$  stimulation. The tumors 1 day after the combined NIR-PIT showed significantly higher level of IFN- $\gamma$  production in CD8 T cells (n = 4-5/group, \*p < 0.05, Mann-Whitney U Test). The regional LNs 2 days after the combined NIR-PIT showed significantly higher level of IFN- $\gamma$  production in CD8 T cells compared to control tumors (n = 5/group, \*\*\*p < 0.001, Mann-Whitney U Test). B. Cytotoxic action of CD8 T cells infiltrating into tumors or regional LNs in mice bearing MC38-luc tumors with or without combined CD44- and CD25-targeted NIR-PIT was examined by flow cytometry without IFN- $\gamma$  stimulation. The tumors and regional LNs 2 days after the combined NIR-PIT showed significantly higher level of IFN- $\gamma$  production in CD8 T cells compared to control tumors (n = 4-5/group, \*p < 0.05, \*\*\*\*p < 0.0001, Mann-Whitney U Test). C. Two days after combined CD44- and CD25-targeted NIR-PIT, up-regulation of activation markers, CD69 in intratumoral CD8 T cells was observed (n = 4-5, \*p < 0.05, Mann-Whitney test).

## Supplementary Figure S2

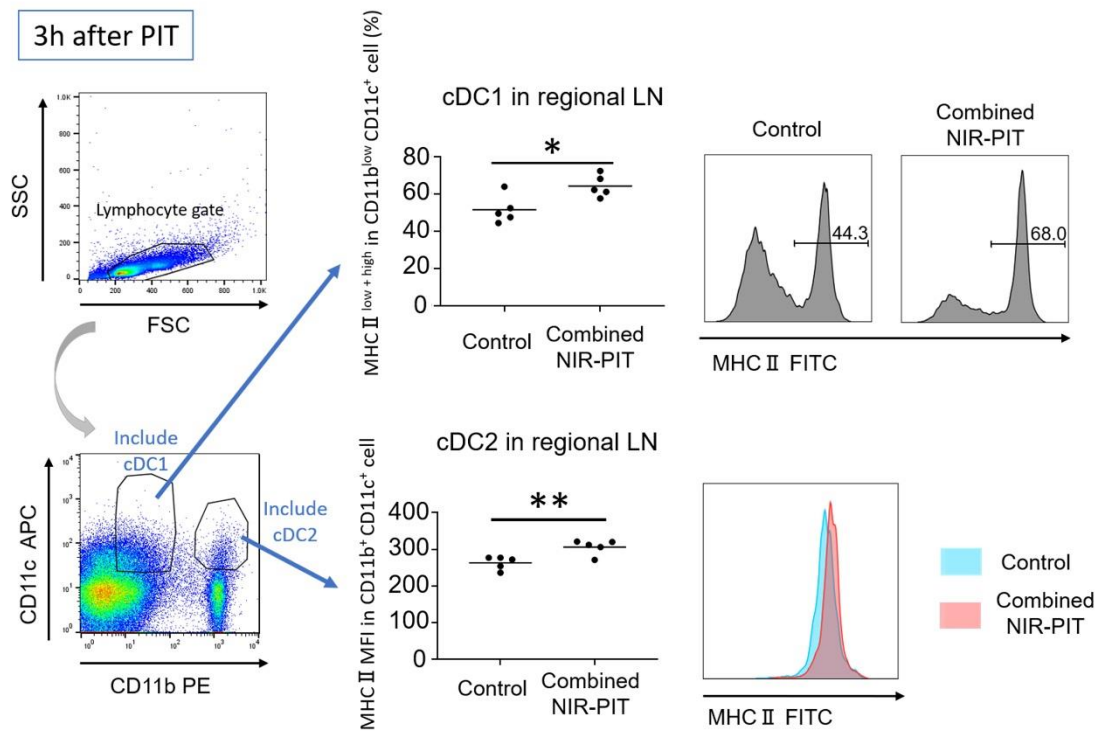

Supplementary Figure 2.

Dendritic cell maturation shortly after combined CD44- and CD25-targeted NIR-PIT. Dendritic cell maturation in regional lymph nodes (LNs) in mice bearing MC38-luc tumors with or without combined CD44- and CD25-targeted NIR-PIT was examined by flow cytometry. The regional LNs 3 hours after the combined NIR-PIT showed significantly higher level of conventional type 1 dendritic cell (cDC1) compared to control LNs ( $n = 5$ ,  $*p < 0.05$ , Mann-Whitney test). Mean fluorescence intensity (MFI) based on MHC class II expression in CD11b<sup>+</sup>CD11c<sup>+</sup> cells was significantly higher in regional LNs 3 hours after the combined NIR-PIT than in control LNs ( $n = 5$ ,  $**p < 0.01$ , Mann-Whitney test), which suggests higher level of conventional type 2 dendritic cell (cDC2) in the combined NIR-PIT group.
